# Supplementary material
Source: publisher figshare collection journal article supplement (https://asha.figshare.com/articles/dataset/_/17701043)
Supplement: Supplementary file 1 [file 1]

## **Supplemental Material S2. Primary topics and discussion questions.**

- Types of adaptive leisure and recreation:
  - Tell us about your participation in active recreation.
  - What do you do for specific activities?
  - Do you participate with an organized adaptive program, if so please list.
  - What is the adaptive sport or recreational activity that you participate in most often?
  - Why do you engage in adaptive sport and recreation?
  - How has your participation changed based on your acquired condition?
  - What is on you 'bucket list' for the future?
- Primary barriers & challenges to participation:
  - What are the primary barriers that you encounter across the recreational setting?
  - What have you done to reduce barriers that you have encountered in these settings?
  - Were you successful in reducing barriers during the experience?
- Supports to access and participate in adaptive sport and active recreation:
  - What type of support do you require to participate?
  - What type of support do you find most helpful in the leisure setting?
  - What type of additional support do you still need?
  - How do you stay motivated to participate in recreation?
- Communication & AAC:
  - What is your primary mode (e.g., verbal, gesture, speech-generating device) of communication across the leisure setting?
  - How does the setting/activity impact communication?
  - What has been your experience using AAC in recreation settings?
  - What characteristics make an effective communication partner in this setting?
  - How do you share your experiences with family & friends (e.g., social media, use of photos or video)?
- Benefits as a result of recreation:
  - What are the primary benefits you experience?
  - Willing to share a photo or short video?
  - Does participation in recreation give you confidence?
- Recommendations for stakeholders in leisure and recreation:
  - What suggestions do you have for stakeholders about improving the experience?
  - What general recommendations do you have for enhancing the experience?
  - Would you recommend participation in active recreation to others?
  - How could recreational stakeholders reach out to other people who use AAC to increase participation?
