# Supplementary material
Source: publisher figshare collection journal article supplement (https://asha.figshare.com/articles/dataset/_/17701043)
Supplement: Supplementary file 3 [file 1]

**Supplemental Material S3.** Number of thought units across focus groups.

| <b>Primary Themes</b> | <b>Acquired<br/>Medical<br/>Conditions</b> | <b>Developmental<br/>Disabilities</b> | <b>Total<br/>Thought<br/>Units</b> |
|-----------------------|--------------------------------------------|---------------------------------------|------------------------------------|
| Barriers              | 26                                         | 25                                    | 51                                 |
| Supports              | 36                                         | 34                                    | 70                                 |
| Benefits              | 30                                         | 31                                    | 61                                 |
| Communication         | 27                                         | 34                                    | 61                                 |
| Recommendations       | 34                                         | 26                                    | 60                                 |
| Total Thought Units   | 153                                        | 150                                   | 303                                |

*Note.* Uncodable units not included. The acquired focus group had 38 uncodable thought units and the developmental group had 17 uncodable thought units.
