# Supplementary material
Source: publisher figshare collection journal article supplement (https://asha.figshare.com/articles/dataset/_/17701043)
Supplement: Supplementary file 4 [file 1]

**Supplemental Material S5.** Examples of programs that offer active recreation.

| <b>Name of Organization</b>   | <b>Activities</b>                                                     | <b>Description</b>                                                                                                                                                         | <b>Contact</b>                                                                                                      |
|-------------------------------|-----------------------------------------------------------------------|----------------------------------------------------------------------------------------------------------------------------------------------------------------------------|---------------------------------------------------------------------------------------------------------------------|
| Special Olympics              | 30-plus Olympic-style individual and team sports                      | Special Olympics is an international organization that offers sport programs for persons with intellectual and physical disabilities.                                      | <a href="https://www.specialolympics.org/programs?locale=en">https://www.specialolympics.org/programs?locale=en</a> |
| Athletes Without Limits (AWL) | Cycling, equestrian, rowing, etc. Hubs in Oregon and Washington, D.C. | AWL helps athletes identify opportunities at the national, regional and local level with a focus on integrating athletes with intellectual and developmental disabilities. | <a href="https://www.athleteswithoutlimits.org/">https://www.athleteswithoutlimits.org/</a>                         |
| Move United                   | 60 plus different sports.                                             | Move United provides sports and recreation to people with a wide range of disabilities.                                                                                    | <a href="https://www.moveunitedsport.org/">https://www.moveunitedsport.org/</a>                                     |
| Outdoors Without Limits (OWL) | Fishing, hunting, camping, hiking                                     | Outdoors Without Limits runs outdoor programs with mentor-mentee style activities.                                                                                         | <a href="https://outdoorswithoutlimits.net/">https://outdoorswithoutlimits.net/</a>                                 |
| Wilderness Inquiry            | Outdoor recreation activities such as canoeing & hiking               | Wilderness Inquiry organizes outdoor trips in a mentor-mentee style program while exploring the outdoors together.                                                         | <a href="https://www.wildernessinquiry.org/mission/">https://www.wildernessinquiry.org/mission/</a>                 |
